# Supplementary material for: Using Deep Learning and B-Splines to Model Blood Vessel Lumen from 3D Images
Source: Sensors (Basel). 2024 Jan 28;24(3):846. doi: 10.3390/s24030846 (PMC10857344; doi:10.3390/s24030846)
Supplement: Supplementary file 1 [file sensors-24-00846-s001.zip]

Archive with 5 entries (5 files):
- Sensors_supplement.pdf
- S1_PAVES_coronal.png
- S2_PAVES_d-scatter.png
- S3_images_for_transfer_training.png
- S4_cnn_error_histo.png
